# Supplementary material
Source: publisher figshare collection journal article supplement (https://gsapubs.figshare.com/articles/dataset/_/24526024)
Supplement: Supplementary file 1 [file 2]

Muhtar, M.N., Xiao, W., Brzozowski, M.J., Mao, Q., Yang, H., and Wu, C., 2023, Permian–Triassic magmatism above a slab window in the Eastern Tianshan: Implications for the evolution of the southern Altaids: GSA Bulletin, <https://doi.org/10.1130/B37133.1>.

## Supplemental Material

Text S1. Analytical methods

Table S1. U-Pb dating results for zircons from the Huangshandong gabbro and Shuangchagou Complex

Table S2. Major- and trace-element composition of the Shuangchagou Complex and Huangshandong gabbro

Table S3. Hf isotope composition of zircon grains from the Huangshandong gabbro and Shuangchagou Complex

Table S4. Bulk rock Sr-Nd isotope composition of the Shuangchagou Complex and Huangshandong gabbro

## Text S1. Analytical methods

### 1 Zircon U–Pb–Hf isotope analyses

Zircon grains were separated by heavy liquid and magnetic techniques, hand-picked under a binocular microscope, and mounted in epoxy resin. The internal structure of zircon grains was characterized by cathodoluminescence (CL) imaging using a HITACHI SUI1510 scanning electron microscope at the State Key Laboratory for Mineral Deposits Research, Nanjing University, China.

Uranium and Pb isotope compositions of zircon grains were measured in situ using an Agilent 7500a laser ablation system coupled with an iCAP RQ ICP–MS at the State Key Laboratory of Mineral Deposits Research, Nanjing University. The laser was operated at an energy density of  $6.5 \text{ J/cm}^2$ , a spot diameter of  $32 \text{ }\mu\text{m}$ , and a repetition rate of 5 Hz. Analyses represent 30 s of gas background followed by 40 s of sample ablation and data acquisition. The homogeneous zircon reference standard GEMOC GJ-1 ( $^{207}\text{Pb}/^{206}\text{Pb}$  age of  $608.5 \pm 0.4 \text{ Ma}$  and  $^{206}\text{Pb}/^{238}\text{U}$  age of  $599.8 \pm 4.5 \text{ Ma}$ ; [Jackson et al., 2004](#)) was analyzed twice every twelve analyses, and was used as an external standard for mass bias and instrument drift correction. The Mud Tank zircon standard was analyzed once every twelve analyses as an independent control. Analyses yielded a weighted mean  $^{206}\text{Pb}/^{238}\text{U}$  age of  $728 \pm 6 \text{ Ma}$  ( $2\sigma$ ;  $\text{MSWD} = 0.69$ ), which is consistent with the age determined by isotope dilution–thermal ionization mass spectrometry ( $732 \pm 5 \text{ Ma}$ ; [Black and Gulson, 1978](#)). The Isoplot 3.0 toolkit for Microsoft Excel was used for age calculations ([Ludwig, 2003](#)).

Lutetium and Hf isotope compositions of zircon grains were determined using a 193 nm ArF excimer laser ablation system coupled to a Nu Instruments Plasma II MC–ICP–MS at Nanjing FocuMS Technology Co. Ltd. Accuracy of the measurements was evaluated by analyzing zircon reference standards 91500 and Plešovice once every fifteen sample analyses; the standard measurements yielded weighted mean  $^{176}\text{Hf}/^{177}\text{Hf}$  ratios of  $0.282307 \pm 0.000031$  ( $2\sigma$ ; [Wu et al., 2006](#)) and  $^{176}\text{Hf}/^{177}\text{Hf}$  ratio of  $0.282482 \pm 0.000013$  ( $2\sigma$ ; [Sláma et al., 2008](#)). To calculate Hf model ages and  $\varepsilon\text{Hf}(t)$  values, a

depleted-mantle model age ( $T_{DM1}$ ) with  $^{176}\text{Hf}/^{177}\text{Hf} = 0.28325$  and  $^{176}\text{Lu}/^{177}\text{Hf} = 0.0384$  (Griffin et al., 2000), and a chondritic model age with  $^{176}\text{Hf}/^{177}\text{Hf} = 0.282772$  and  $^{176}\text{Lu}/^{177}\text{Hf} = 0.0332$  (Blichert et al., 1997) were utilized. A value of  $1.865 \times 10^{-11} \text{ a}^{-1}$  was used as the  $^{176}\text{Lu}$  decay constant in the  $\epsilon\text{Hf}(t)$  calculation (Scherer et al., 2001). An average crustal  $^{176}\text{Lu}/^{177}\text{Hf}$  value of 0.015 was used to calculate crustal model ages ( $T_{DM2}$ ) (Griffin et al., 2002).

## 2 Bulk-rock major- and trace-element, and Sr–Nd–Fe isotope analyses

Bulk-rock major-element chemistry was determined at ALS Chemex (Guangzhou) Co. Ltd. Fresh rock chips were separated from crushed bulk-rock samples in preparation for chemical analysis. All of the samples were ground in an agate mill to  $\sim 200$  mesh. Major oxides were determined by the ME-XRF-06 package. The accuracy of the analyses is  $<1\%$  for all major elements. Bulk-rock trace-element chemistry was measured by using a Finnigan Element II HR–ICP–MS at the State Key Laboratory for Mineral Deposits Research, Nanjing University following the analytical conditions and procedures described in Gao et al. (2003). The United States Geological Survey (USGS) rock standards BHVO-2, BCR-2, and AVG-1 were utilized as external standards. The analytical uncertainty for trace elements is better than 5%.

Bulk-rock Sr and Nd isotope compositions were determined using a Nu Intruments Plasma II MC–ICP–MS equipped with an Aridus II desolvating nebulizer at Nanjing FocuMS Technology Co. Ltd. following the analytical procedures described in Muhtar et al. (2020). Raw isotopic ratios were internally corrected for mass fractionation by normalizing to  $^{86}\text{Sr}/^{88}\text{Sr} = 0.1194$  for Sr and  $^{146}\text{Nd}/^{144}\text{Nd} = 0.7219$  for Nd using an exponential law. International isotopic standards (NIST SRM 987 for Sr, JNdi-1 for Nd) were analyzed once every third sample to correct for instrumental drift. The Sr–Nd isotope compositions of geological reference materials AVG-2 ( $^{143}\text{Nd}/^{144}\text{Nd} = 0.512793 \pm 0.0003$  and  $^{87}\text{Sr}/^{86}\text{Sr} = 0.703979 \pm 0.0004$ ), BHVO-2 ( $^{143}\text{Nd}/^{144}\text{Nd} = 0.512977 \pm 0.0002$  and  $^{87}\text{Sr}/^{86}\text{Sr} = 0.703481 \pm 0.0005$ ), and BCR-2 ( $^{143}\text{Nd}/^{144}\text{Nd} = 0.512636 \pm 0.0004$  and  $^{87}\text{Sr}/^{86}\text{Sr} = 0.705025 \pm 0.0004$ ) were measured once every ten

sample to ensure the accuracy of sample measurements. The measured isotope compositions of these standards are in excellent agree with previously published results within analytical uncertainty (Weis et al., 2006).

Bulk-rock Fe isotope compositions were measured on a Nu 1700 Sapphire MC–ICP–MS at the State Key Laboratory for Mineral Deposits Research, Nanjing University, China. The purification and analytical methods have been described in detail by Du et al. (2017). The analytical conditions and procedures have also been described in Brzozowski et al. (2022). A standard–sample–standard bracketing method was used to correct for mass bias and instrument drift, and Fe isotope compositions are reported as the per mil deviation ( $\delta^{56}\text{Fe}$ ) from the international standard IRMM-014 ( $\delta^{56}\text{Fe}_{\text{sample}} = [({}^{56}\text{Fe}/{}^{54}\text{Fe})_{\text{sample}} / ({}^{56}\text{Fe}/{}^{54}\text{Fe})_{\text{IRMM-014}} - 1] \times 1000$  [‰]). Analytical reproducibility on  $\delta^{56}\text{Fe}$  is better than  $\pm 0.06$ ‰ (2 standard deviations, 2SD) based on repeated analyses of several international standards against an in-house stock solution (Du et al., 2017; Brzozowski et al., 2022). The measured BHVO-2, GSP-2, AGV-2, DTS-2, and w-2a geological standards, which were also purified via the same chromatographic procedures, yield  $\delta^{56}\text{Fe}$  values of  $0.09 \pm 0.03$ ‰ ( $\delta^{57}\text{Fe} = 0.13 \pm 0.02$ ‰,  $n = 3$ , 2SD),  $0.09 \pm 0.04$ ‰ ( $\delta^{57}\text{Fe} = 0.13 \pm 0.03$ ‰,  $n = 3$ , 2SD),  $0.11 \pm 0.07$ ‰ ( $\delta^{57}\text{Fe} = 0.19 \pm 0.05$ ‰,  $n = 3$ , 2SD),  $-0.01 \pm 0.03$ ‰ ( $\delta^{57}\text{Fe} = 0.00 \pm 0.02$ ‰,  $n = 3$ , 2SD), and  $-0.01 \pm 0.01$ ‰ ( $\delta^{57}\text{Fe} = 0.06 \pm 0.03$ ‰,  $n = 3$ , 2SD), respectively, consistent with previously published results within analytical uncertainty (Craddock and Dauphas, 2011).

## References

- Black, L.P., and Gulson, B.L., 1978, The age of the mud tank carbonatite, Strangways Range, Northern Territory: *Journal of Australian Geology Geophysics*, v. 3, p. 227–232.
- Blichert-Toft, J., Chauvel, C., and Albarède, F., 1997, Separation of Hf and Lu for high-precision isotope analysis of rock samples by magnetic sector-multiple collector

- ICP-MS: Contributions to Mineralogy and Petrology, v. 127, p. 248–260. doi:10.1007/s004100050278.
- Brzozowski, M.J., Good, D.J., Yan, W., Wu, C., An, S., and Li, W., 2022, Mg–Fe isotopes link the geochemical complexity of the Coldwell Complex, Midcontinent Rift to metasomatic processes in the mantle: *Journal of Petrology*, v. 63(8), p. 1–23. doi.org/10.1093/petrology/egac081.
- Craddock, P.R., and Dauphas, N., 2011, Iron isotopic compositions of geological reference materials and chondrites: *Geostandards and Geoanalytical Research*, v. 35, p. 101–123. doi.org/10.1111/j.1751-908X.2010.00085.x.
- Du, D.H., Wang, X.L., Yang, T., Chen, X., Li, J.Y., and Li, W., 2017, Origin of heavy Fe isotope compositions in high-silica igneous rocks: a rhyolite perspective: *Geochimica et Cosmochimica Acta*, v. 218, p. 58–72. doi.org/10.1016/j.gca.2017.09.014.
- Gao, J.F., Lu, J.J., Lai, M.Y., Lin, Y.P., and Pu, W., 2003, Analysis of trace elements in rock samples using HR-ICPMS: *Journal of Nanjing University (Nature Science)*, v. 39, p. 844–850 (in Chinese with English abstract).
- Griffin, W.L., Pearson, N.J., Belousova, E., Jackson, S.E., Van Acherbergh, E., O'Reilly, S.Y., and Shee, S.R., 2000, The Hf isotope composition of cratonic mantle: LAM-MC-ICPMS analysis of zircon megacrysts in kimberlites: *Geochimica et Cosmochimica Acta*, v. 64, p. 133–147. doi:10.1016/s0016-7037(99)00343-9.
- Griffin, W.L., Wang, X., Jackson, S.E., Pearson, N.J., O'Reilly, S.Y., Xu, X.S., and Zhou, X.M., 2002, Zircon chemistry and magma mixing, SE China: in-situ analysis of Hf isotopes, Tonglu and Pingtan igneous complexes: *Lithos*, v. 61, p. 237–269. doi:10.1016/s0024-4937(02)00082-8.
- Jackson, S.E., Pearson, N.J., Griffin, W.L., and Belousova, E.A., 2004, The application of laser ablation-inductively coupled plasma-mass spectrometry to in situ U-Pb zircon geochronology: *Chemical Geology*, v. 211, p. 47–69. doi.org/10.1016/j.chemgeo.2004.06.017.

- Ludwig, K. R., 2003, User's manual for isoplot 3.00: a geochronological toolkit for Microsoft Excel: Berkeley Geochronology Center Special Publication, v. 4, p. 25–32.
- Muhtar, M.N., Wu, C.Z., Santosh, M., Lei, R.X., Gu, L.X., Wang, S.M., and Gan, K., 2020, Late Paleozoic tectonic transition from subduction to post-collisional extension in Eastern Tianshan, Central Asian Orogenic Belt: Geological Society of America Bulletin 132, 1756–1774. doi.org/10.1130/B35432.1.
- Scherer, E., Münker, C., and Mezger, K., 2001, Calibration of the Lutetium-Hafnium clock: Science, v. 293, p. 683–687. doi:10.1126/science.1061372.
- Sláma, J., Košler, J., Condon, D.J., Crowley, J.L., Gerdes, A., Hanchar, J.M., Horstwood, M.S.A., Morris, G.A., Nasdala, L., Norberg, N., Schaltegger, U., Schoene, B., Tubrett, M.N., and Whitehouse, M.J., 2008, Plešovice zircon—a new natural reference material for U–Pb and Hf isotopic microanalysis: Chemical Geology, v. 249(1-2), p. 1–35. doi:10.1016/j.chemgeo.2007.11.005.
- Weis, D., Kieffer, B., Maerschalk, C., Barling, J., de Jong, J., Williams, G. A., Hanano, D, Pretorius, P., Mattielli, N., Scoates, J.S., Goolaerts, A., Friedman, R. M., and Mahoney, J.B., 2006, High-precision isotopic characterization of USGS reference materials by TIMS and MC-ICP-MS: Geochemistry, Geophysics, Geosystems , v. 7(8), p. 1–30. doi:10.1029/2006gc001283.
- Wiedenbeck, M.A.P.C., Alle, P., Corfu, F.Y., Griffin, W.L., Meier, M., Oberli, F.V., Quadt, A.V., Roddick, J.C., and Spiegel, W., 1995, Three natural zircon standards for U-Th-Pb, Lu-Hf, trace element and REE analyses: Geostandards Newsletter, v. 19(1), p. 1–23. doi:10.1111/j.1751-908X.1995.tb00147.x.
- Wu, F.Y., Yang, Y.H., Xie, L.W., Yang, J.H., and Xu, P., 2006, Hf isotopic compositions of the standard zircons and baddeleyites used in U–Pb geochronology: Chemical Geology, v. 234(1-2), p. 105–126. doi.org/10.1016/j.chemgeo.2006.05.003.
